# Supplementary material for: Linking genomic and physiological characteristics of psychrophilic Arthrobacter to metagenomic data to explain global environmental distribution
Source: Microbiome. 2021 Jun 12;9:136. doi: 10.1186/s40168-021-01084-z (PMC8196931; doi:10.1186/s40168-021-01084-z)
Supplement: Supplementary file 9 — Additional file 8: Dataset S7. Correlation of the abundance of Arthrobacter with taxa from Axel Heiberg Island metagenomes. [file 40168_2021_1084_MOESM8_ESM.xlsx]

## Sheet: positive correlations > 0.5
Dataset S7 Correlation of the abundance of Arthrobacter with taxa from Axel Heiberg Island metagenomes
	GroupC		GroupA		Significant for which group?	Phylum	Key feature	Main habitats
OTU	Correlation	p-value	Correlation	p-value
GroupC	1	0	0.876309	0	-	Actinobacteria
GroupA	0.876309	0	1	0	-	Actinobacteria
Cellulomonas	0.833492	0	0.757099	0	both	Actinobacteria
Rhodococcus	0.802787	0	0.695709	0	both	Actinobacteria
Arthrobacter	0.801985	0	0.75603	0	both	Actinobacteria
Sanguibacter	0.800278	0	0.740928	0	both	Actinobacteria
Desulfotomaculum	0.796043	0	0.708113	0	both	Firmicutes
Microbacterium	0.786614	0	0.709657	0	both	Actinobacteria
Kocuria	0.78248	0	0.684379	0	both	Actinobacteria
Leifsonia	0.769087	0	0.685353	0	both
Blastococcus	0.766722	0	0.622361	0	both
Micromonospora	0.759211	0	0.655115	0	both
Streptomyces	0.754633	0	0.61493	0	both
Mycobacterium	0.750452	0	0.616651	0	both
Jiangella	0.748195	0	0.600976	0	both
Paenibacillus	0.747672	0	0.684285	0	both
Nocardia	0.746998	0	0.646868	0	both
Nakamurella	0.744934	0	0.61858	0	both
Nocardioides	0.744933	0	0.619588	0	both
Geodermatophilus	0.740717	0	0.636316	0	both
Intrasporangium	0.731129	0	0.635896	0	both
Bacillus	0.728192	0	0.673802	0	both
Actinopolyspora	0.725013	0	0.601768	0	both
Nocardiopsis	0.723615	0	0.595774	0	both
Brevibacillus	0.721146	0	0.651032	0	both
Aeromicrobium	0.715554	0	0.62261	0	both
Brachybacterium	0.709937	0	0.62293	0	both
Amycolatopsis	0.705245	0	0.547761	0	both
Eubacterium	0.703409	0	0.6296	0	both
Tsukamurella	0.69225	0	0.517959	0	both
Saccharopolyspora	0.681629	0	0.552583	0	both
Bifidobacterium	0.670113	0	0.584332	0	both
Actinomyces	0.666519	0	0.576301	0	both
Actinoplanes	0.66417	0	0.486205	0	GroupC	Actinobacteria		soil
Chlamydia	0.660065	0	0.675287	0	both
Alicyclobacillus	0.657642	0	0.535133	0	both
Nonomuraea	0.65462	0	0.594373	0	both
Leptospirillum	0.651081	0	0.581656	0	both
Patulibacter	0.643074	0	0.509924	0	both
Brevibacterium	0.637439	0	0.50644	0	both
Herbaspirillum	0.636475	0	0.595996	0	both
Dietzia	0.6362	0	0.527732	0	both
Frankia	0.635204	0	0.462939	0	GroupC	Actinobacteria		symbionts of plants
Propionibacterium	0.632572	0	0.53985	0	both
Campylobacter	0.63084	0	0.581195	0	both
Gordonia	0.621901	0	0.486942	0	GroupC	Actinobacteria		soil
Halorubrum	0.621227	0	0.540557	0	both
Pseudomonas	0.620815	0	0.545503	0	both
Butyrivibrio	0.617957	0	0.598168	0	both
Sporomusa	0.61571	0	0.593532	0	both
Kribbella	0.613387	0	0.489779	0	GroupC	Actinobacteria		soil
Thiomicrospira	0.60962	0	0.526822	0	both
Clostridium	0.606943	0	0.618136	0	both
Pseudonocardia	0.605755	0	0.446194	0	GroupC	Actinobacteria		soil
Aeromonas	0.60513	0	0.555576	0	both
Glycomyces	0.603865	0	0.451886	0	GroupC	Actinobacteria		soil
Methylomonas	0.601867	0	0.530635	0	both
Selenomonas	0.600298	0	0.5156	0	both
Marinobacter	0.600175	0	0.519185	0	both
Oscillibacter	0.598771	0	0.495153	0	GroupC	Firmicutes		mammals
Moorella	0.598604	0	0.523813	0	both
Kitasatospora	0.598255	0	0.439275	0	GroupC	Actinobacteria		soil
Rhodoferax	0.596664	0	0.533286	0	both
Oceanobacillus	0.596139	0	0.534162	0	both
Microlunatus	0.592618	0	0.466408	0	GroupC	Actinobacteria		soil
Variovorax	0.592033	0	0.515443	0	both
Conexibacter	0.585409	0	0.43783	0	GroupC	Actinobacteria		soil
Janthinobacterium	0.582776	0	0.543762	0	both
Massilia	0.580903	0	0.556374	0	both
Halobacillus	0.580145	0	0.525587	0	both
Anoxybacillus	0.579944	0	0.550211	0	both
Halomonas	0.579777	0	0.518173	0	both
Kyrpidia	0.577838	0	0.533169	0	both
Treponema	0.574127	0	0.535222	0	both
Desulfuromonas	0.57215	0	0.520044	0	both
Halanaerobium	0.568146	0	0.550226	0	both
Azoarcus	0.566099	0	0.455638	0	GroupC	Proteobacteria	nitrogen-fixing bacteria	soil
Comamonas	0.561736	0	0.525487	0	both
Acholeplasma	0.557011	0	0.458297	0	GroupC	Tenericutes		plants
Pedosphaera	0.556914	0	0.468602	0	GroupC	Verrucomicrobia		soil
Blautia	0.556717	0	0.463184	0	GroupC	Firmicutes		mammals
Sporolactobacillus	0.554371	0	0.416535	0	GroupC	Firmicutes		soil
Carnobacterium	0.550534	0	0.544678	0	both
Thermodesulfobacterium	0.548494	0	0.499068	0	GroupC	Proteobacteria	sulfate-reducing bacteria	thermal water
Synergistes	0.542702	0	0.476976	0	GroupC	Synergistetes		soil, mammals
Methanoculleus	0.541581	0	0.487009	0	GroupC	Euryarchaeota	methane-producing archaea	brackish water
Sporosarcina	0.538677	0	0.484275	0	GroupC	Firmicutes		soil
Legionella	0.538341	0	0.530422	0	both
Enhydrobacter	0.533241	0	0.464207	0	GroupC	Proteobacteria		freshwater
Corynebacterium	0.532477	0	0.391924	0	GroupC	Actinobacteria		soil
Thauera	0.53058	0	0.444391	0	GroupC	Proteobacteria		freshwater, saline water
Olsenella	0.527247	0	0.465222	0	GroupC	Actinobacteria		mammals
Salinispora	0.526851	0	0.359888	0	GroupC	Actinobacteria		sea water
Enterococcus	0.525606	0	0.521353	0	both
Lactobacillus	0.524792	0	0.463873	0	GroupC	Firmicutes		foods, mammals
Desulfosporosinus	0.521237	0	0.5328	0	both
Ensifer	0.521237	0	0.373882	0	GroupC	Proteobacteria	nitrogen-fixing bacteria	soil
Caldanaerobius	0.521175	0	0.508832	0	both
Synechocystis	0.519435	0	0.41041	0	GroupC	Cyanobacteria	phototrophic/heterotrophic bacteria	freshwater
Thiobacillus	0.517712	0	0.481065	0	GroupC	Proteobacteria	nitrogen-fixing bacteria	soil
Sphingomonas	0.515627	0	0.4477	0	GroupC	Proteobacteria		soil
Mobilicoccus	0.515606	0	0.42708	0	GroupC	Actinobacteria		fishes
Lysinibacillus	0.515486	0	0.507196	0	both
Methylobacter	0.509199	0	0.471897	0	GroupC	Proteobacteria	psychrotrophic methanotrophic bacteria	soil
Nesterenkonia	0.509079	0	0.388149	0	GroupC	Actinobacteria		soil
Janibacter	0.507722	0	0.381647	0	GroupC	Actinobacteria		soil
Mesotoga	0.505275	0	0.480369	0	GroupC	Thermotogae		soil
Acidovorax	0.501977	0	0.433976	0	GroupC	Proteobacteria		soil
Key references
Chen MH, Sheu SY, James EK, Young CC, Chen WM. Azoarcus olearius sp. nov., a nitrogen-fixing bacterium isolated from oil-contaminated soil. Int J Syst Evol Micr. 2013;63:3755-61.
Zeikus JG, Dawson MA, Thompson TE, Ingvorsen K, Hatchikian EC. Microbial ecology of volcanic Sulphidogenesis: Isolation and characterization of Thermodesulfobacterium commune gen. nov. and sp. nov. Microbiology. 1983;129:1159-69.
Maestrojuan GM, Boone DR, Xun L, Mah RA, Zhang L. Transfer of Methanogenium bourgense, Methanogenium marisnigri, Methanogenium olentangyi, and Methanogenium thermophilicum to the Genus Methanoculleus gen. nov., Emendation of Methanoculleus marisnigri and Methanogenium, and Description of New Strains of Methanoculleus bourgense and Methanoculleus marisnigri. Int J Syst Bacteriol. 1990;40:117-22.
Rogel MA, Hernandez-Lucas I, Kuykendall LD, Balkwill DL, Martinez-Romero E. Nitrogen-Fixing Nodules with Ensifer adhaerens Harboring Rhizobium tropici Symbiotic Plasmids. Appl Environ Microbiol. 2001;67:3264-8.
Takakazu K, Satoshi T. Complete genome structure of the unicellular cyanobacterium Synechocystis sp. PCC6803. Plant Cell Physiol. 1997:1171.
Chapman SJ. Thiobacillus populations in some agricultural soils. Soil Biol Biochem. 1990;22:479-82.
Wartiainen I, Hestnes AG, Mcdonald IR, Svenning MM. Methylobacter tundripaludum sp. nov., a methane-oxidizing bacterium from Arctic wetland soil on the Svalbard islands, Norway (78 N). Int J Syst Evol Micr. 2006;56:109.

## Sheet: negative correlations < -0.5
Dataset S7 Correlation of the abundance of Arthrobacter with taxa from Axel Heiberg Island metagenomes
	GroupC		GroupA		Significant for which group?	Phylum	Key feature	Main habitats
OTU	Correlation	p-value	Correlation	p-value
Robiginitalea	-0.73926	0	-0.684827	0	both
Octadecabacter	-0.728681	0	-0.674406	0	both
Sinorhizobium	-0.715135	0	-0.658223	0	both
Desulfonatronospira	-0.683789	0	-0.618452	0	both
Nitritalea	-0.648563	0	-0.55041	0	both
Cyanothece	-0.644271	0	-0.581681	0	both
Gymnopus	-0.64152	0	-0.604871	0	both
Akkermansia	-0.639577	0	-0.571435	0	both
Rhodospirillum	-0.624333	0	-0.659743	0	both
Roseibium	-0.622862	0	-0.594125	0	both
Dinoroseobacter	-0.611439	0	-0.617453	0	both
Zymomonas	-0.608898	0	-0.563009	0	both
Candidatus Pelagibacter	-0.607547	0	-0.555024	0	both
Shewanella	-0.606015	0	-0.532719	0	both
Laccaria	-0.605009	0	-0.578474	0	both
Candidatus Kuenenia	-0.601686	0	-0.544346	0	both
Turneriella	-0.600915	0	-0.600057	0	both
Corallococcus	-0.594348	0	-0.624737	0	both
Coprinopsis	-0.594129	0	-0.558954	0	both
Acaryochloris	-0.584622	0	-0.544821	0	both
Chlorobium	-0.580885	0	-0.512492	0	both
Emticicia	-0.5789	0	-0.477512	0	GroupC	Bacteroidetes		freshwater
Congregibacter	-0.568777	0	-0.538622	0	both
Starkeya	-0.547609	0	-0.577951	0	both
Ricinus	-0.546892	0	-0.488517	0	GroupC	Phragmoplastophyta	flowering plant	soil
Brucella	-0.544715	0	-0.505602	0	both
Xenopus	-0.544556	0	-0.510112	0	both
Chloroherpeton	-0.542804	0	-0.534031	0	both
Methanocaldococcus	-0.542643	0	-0.401067	0	GroupC	Euryarchaeota		sea water
Gluconacetobacter	-0.541818	0	-0.596677	0	both
Arthrospira	-0.540989	0	-0.496482	0	GroupC	Cyanobacteria	photosynthetic bacteria	alkaline lake
Leptonema	-0.537206	0	-0.533084	0	both
Fulvimarina	-0.535709	0	-0.5696	0	both
Penicillium	-0.535554	0	-0.466558	0	GroupC	Ascomycota		cereals, other foods
Ignavibacterium	-0.533542	0	-0.502457	0	both
Raphidiopsis	-0.532824	0	-0.487699	0	GroupC	Cyanobacteria	photosynthetic bacteria	freshwater
Caldithrix	-0.531181	0	-0.537708	0	both
Methylacidiphilum	-0.529913	0	-0.475731	0	GroupC	PVC group		thermal water
Krokinobacter	-0.529026	0	-0.506528	0	both
Aquiflexum	-0.528898	0	-0.459624	0	GroupC	Bacteroidetes		sea water
Citromicrobium	-0.528062	0	-0.549536	0	both
Thiorhodovibrio	-0.527957	0	-0.498455	0	GroupC	Proteobacteria		alkaline lake
Phanerochaete	-0.527217	0	-0.499424	0	GroupC	Basidiomycota	crust fungi	woods
Taylorella	-0.525548	0	-0.476993	0	GroupC	Proteobacteria		mammals
Haliscomenobacter	-0.523073	0	-0.447419	0	GroupC	Bacteroidetes		freshwater
Chthoniobacter	-0.522245	0	-0.511594	0	both
Joostella	-0.521941	0	-0.445553	0	GroupC	Bacteroidetes		sea water
Cylindrospermopsis	-0.521773	0	-0.480039	0	GroupC	Cyanobacteria	photosynthetic bacteria	freshwater
Parasutterella	-0.51955	0	-0.475079	0	GroupC	Proteobacteria	core gut microbiota	mammals
Azorhizobium	-0.514284	0	-0.573705	0	both
Calditerrivibrio	-0.510681	0	-0.468939	0	GroupC	Deferribacteres		thermal water
Rhodomicrobium	-0.510223	0	-0.532778	0	both
Capitella	-0.507821	0	-0.432869	0	GroupC	Annelida	polychaete worm	coastal/marine
Physcomitrella	-0.507361	0	-0.499612	0	GroupC	Phragmoplastophyta	moss	soil
Rahnella	-0.50649	0	-0.506026	0	both
Methylocella	-0.505994	0	-0.547626	0	both
Roseobacter	-0.504437	0	-0.521307	0	both
Flectobacillus	-0.503893	0	-0.410327	0	GroupC	Bacteroidetes		sea water
Teredinibacter	-0.50387	0	-0.459377	0	GroupC	Proteobacteria		symbionts of bivalves
Selaginella	-0.503433	0	-0.458629	0	GroupC	Phragmoplastophyta	spike moss	soil
Staphylothermus	-0.502108	0	-0.421088	0	GroupC	Crenarchaeota		thermal water
Bermanella	-0.501397	0	-0.42631	0	GroupC	Proteobacteria		sea water
Schizophyllum	-0.500923	0	-0.487138	0	GroupC	Basidiomycota	mushroom	wood
Plesiocystis	-0.497193	0	-0.54827	0	GroupA
Gemmatimonas	-0.488099	0	-0.53421	0	GroupA
Thioflavicoccus	-0.450511	0	-0.504998	0	GroupA
Key references
Chan A, Crabtree J, Zhao Q, Lorenzi H, Orvis J, Puiu D, et al. Draft genome sequence of the oilseed species Ricinus communis. Nat Biotechnol. 2010;28:951-6.
Mitra M, Mishra S. Multiproduct biorefinery from Arthrospira spp. towards zero waste: Current status and future trends. Bioresour Technol. 2019;291:121928.
Aguilera A, Gómez EB, Kaštovský J, Echenique RO, Salerno GL. The polyphasic analysis of two native Raphidiopsis isolates supports the unification of the genera Raphidiopsis and Cylindrospermopsis (Nostocales, Cyanobacteria). Phycologia. 2018;57:130-46.
Bumpus J. Biodegradation of polycyclic hydrocarbons by Phanerochaete chrysosporium. Appl Environ Microbiol. 1989;55:154-8.
Neilan B, Saker M, Fastner J, Törökné A, Burns B. Phylogeography of the invasive cyanobacterium Cylindrospermopsis raciborskii. Mol Ecol. 2003;12:133-40.
Ju T, Kong J, Stothard P, Willing B. Defining the role of Parasutterella, a previously uncharacterized member of the core gut microbiota. ISME J. 2019;13:1520-34.
Grassle J, Grassle J. Sibling species in the marine pollution indicator Capitella (polychaeta). Science. 1976;192:567-9.
Cove D. The moss Physcomitrella patens. J Plant Growth Regul. 2000;19:275-83.
Banks J, Nishiyama T, Hasebe M, Bowman J, Gribskov M, dePamphilis C, et al. The Selaginella genome identifies genetic changes associated with the evolution of vascular plants. Science. 2011;332:960-3.
Ohm R, de JJ, Lugones L, Aerts A, Kothe E, Stajich J, et al. Genome sequence of the model mushroom Schizophyllum commune. Nat Biotechnol. 2010;28:957-63.
